# Supplementary material for: Investigating COVID-19 Pandemic Effects on Acute Pancreatitis Development—From the Perspective of Alcohol Sales (Consumption) in a Japanese Regional Hospital
Source: MDPI journal article supplement (doi:10.3390/healthcare11202769), 2023-10-19
Supplement: s1 [file s1]

## Supplementary Table S1. Japanese severity scoring system for acute pancreatitis (Ministry of Health, Labor and Welfare of Japan, 2008 revision)

---

Prognostic factors (1 point for each factor)

1. Base excess  $\leq -3$  mEq /L or shock (systolic blood pressure  $<80$  mmHg)
2.  $P_aO_2 \leq 60$  mmHg (room air) or respiratory failure (requiring ventilatory management)
3. BUN  $\geq 40$  mg/dl or creatinine  $\geq 2.0$  mg/dl or oliguria (daily urine output  $<400$  ml even after intravenous fluid resuscitation)
4. Lactate dehydrogenase  $\geq 2$  ULN
5. Platelet count  $\leq 100\,000/\text{mm}^3$
6. Serum Ca  $\leq 7.5$  mg/dl
7. C-reactive protein  $\geq 15$  mg/dl
8. No. positive measures in SIRS criteria  $\geq 3$
9. Age  $\geq 70$  y

CT grade based on contrast-enhanced CT

1. Extrapancreatic progression of inflammation
 

|                             |          |
|-----------------------------|----------|
| Anterior pararenal space    | 0 point  |
| Root of mesocolon           | 1 point  |
| Beyond lower pole of kidney | 2 points |
  2. Low enhanced lesion of the pancreas
 

The pancreas is conveniently divided into three segments (head, body, and tail)

|                                                            |          |
|------------------------------------------------------------|----------|
| Localized in each segment or only surrounding the pancreas | 0 point  |
| Extends to two segments                                    | 1 point  |
| Occupies two entire segments or more                       | 2 points |
- 1 + 2 = total score

|                      |         |
|----------------------|---------|
| Total score = 0 or 1 | Grade 1 |
| Total score = 2      | Grade 2 |
| Total score $\geq 3$ | Grade 3 |

#### Assessment of severity

If the prognostic factors score is  $\geq 3$  or CT grade is  $\geq 2$ , the disease is graded as 'severe'.

---

The systemic inflammatory response syndrome (SIRS) criteria include body temperature  $>38^{\circ}\text{C}$  or  $<36^{\circ}\text{C}$ , heart rate  $>90$  bpm, respiratory rate  $>20$  breaths/min or  $P_{\text{a}}\text{CO}_2 \leq 32$  torr, and white blood cell counts  $> 12\,000$  cells/mm<sup>3</sup>,  $<4000$  cells/mm<sup>3</sup>, or  $>10\%$  immature (band) forms.

BUN, blood urea nitrogen; ULN, upper limit of normal; CT, computed tomography.
